# Supplementary material
Source: PubMed Central journal article supplement (PMC4884146)
Supplement: NIHMS772945-supplement-supplement_1.pdf [file NIHMS772945-supplement-supplement_1.pdf]

|                    |        |       |       |
|--------------------|--------|-------|-------|
| Inflection point   | -28.5  | -21.0 | -30.0 |
| LRT test (p-value) | <0.001 |       |       |

. <0.1, \*<0.05, \*\*<0.01, \*\*\*<0.0001. #Likelihood ratio test (LRT) compared to the model without an inflection point.
